# Supplementary material for: Synthesis and Structure of Novel Copper(II) Complexes with N,O- or N,N-Donors as Radical Scavengers and a Functional Model of the Active Sites in Metalloenzymes
Source: MDPI journal article supplement (doi:10.3390/ijms22147286), 2021-07-06
Supplement: s1 [file s1]

# Synthesis and structure of novel copper(II) complexes with N,O- or N,N-donors as radical scavengers and a functional model of the active sites in metalloenzymes

Joanna Masternak, Małgorzata Zienkiewicz-Machnik, Iwona Łakomska, Maciej Hodorowicz, Katarzyna Kazimierczuk, Milena Nosek, Amelia Majkowska-Młynarczyk, Joanna Wietrzyk, Barbara Barszcz

**Table S1.** Selected bond lengths (Å) for compounds **1** - **5**.

| <b>1</b>   |          | <b>2</b>    |          | <b>3</b>                |          | <b>4</b>                 |          | <b>5</b>                 |            |
|------------|----------|-------------|----------|-------------------------|----------|--------------------------|----------|--------------------------|------------|
| Cu(1)-O(3) | 1.939(2) | Cu(1)-N(1)  | 1.990(1) | Cu(1)-O(2)              | 1.923(5) | Cu(1)-N(1A)              | 1.909(5) | Cu(1)-N(1)               | 2.0083(19) |
| Cu(1)-N(3) | 2.021(3) | Cu(1)-O(17) | 2.001(1) | Cu(1)-O(2) <sup>i</sup> | 1.936(5) | Cu(1)-N(1A) <sup>i</sup> | 1.910(5) | Cu(1)-N(1) <sup>i</sup>  | 2.0083(19) |
| Cu(1)-N(1) | 2.023(3) | Cu(1)-O(8)  | 2.014(1) | Cu(1)-N(2)              | 1.992(7) | Cu(1)-N(1) <sup>i</sup>  | 2.011(2) | Cu(1)-N(13)              | 2.0097(19) |
| Cu(1)-N(2) | 2.037(3) | Cu(1)-O(16) | 2.240(1) | Cu(1)-N(1)              | 2.024(6) | Cu(1)-N(1)               | 2.011(2) | Cu(1)-N(13) <sup>i</sup> | 2.0097(19) |
| Cu(1)-O(1) | 2.295(3) | Cu(1)-O(18) | 2.313(1) | Cu(1)-O(1)              | 2.288(6) | Cu(1)-N(3)               | 2.252(3) | Cu(1)-O(14)              | 2.4429(1)  |
| Cu(1)-O(2) | 2.426(3) | Cu(1)-N(9)  | 1.997(1) |                         |          | Cu(1)-N(3) <sup>i</sup>  | 2.252(3) | Cu(1)-O(14) <sup>i</sup> | 2.4429(1)  |

Symmetry transformations used to generate equivalent atoms for: (3) (i) -x+1, y, -z+1/2; (4) (i) -x+1/2, -y+1/2, z; (5) (i) -x+1, -y, -z+1;

**Table S2.** Selected valence angles (°) for compounds **1** - **5**.

| <b>1</b>        |            | <b>2</b>          |           | <b>3</b>                      |          | <b>4</b>                                    |           | <b>5</b>                       |            |
|-----------------|------------|-------------------|-----------|-------------------------------|----------|---------------------------------------------|-----------|--------------------------------|------------|
| O(3)-Cu(1)-N(3) | 81.93(11)  | N(1)-Cu(1)-N(9)   | 168.80(5) | O(2)-Cu(1)-O(2) <sup>i</sup>  | 76.1(2)  | N(1A)-Cu(1)-N(1A) <sup>i</sup>              | 41.3(3)   | N(1)-Cu(1)-N(1) <sup>i</sup>   | 180.0      |
| O(3)-Cu(1)-N(1) | 175.44(11) | N(1)-Cu(1)-O(17)  | 93.98(5)  | O(2)-Cu(1)-N(2)               | 92.8(2)  | N(1A) <sup>i</sup> -Cu(1)-N(1)              | 96.92(1)  | N(1)-Cu(1)-N(13)               | 88.50(8)   |
| N(3)-Cu(1)-N(1) | 95.25(12)  | N(9)-Cu(1)-O(17)  | 93.29(5)  | O(2) <sup>i</sup> -Cu(1)-N(2) | 166.3(2) | N(1A) <sup>i</sup> -Cu(1)-N(1) <sup>i</sup> | 96.48(1)  | N(1)-Cu(1)-N(13) <sup>i</sup>  | 91.50(8)   |
| O(3)-Cu(1)-N(2) | 88.44(10)  | N(1)-Cu(1)-O(8)   | 80.91(5)  | O(2)-Cu(1)-N(1)               | 166.3(3) | N(1)-Cu(1)-N(1) <sup>i</sup>                | 165.67(1) | N(13)-Cu(1)-N(13) <sup>i</sup> | 180.0      |
| N(3)-Cu(1)-N(2) | 166.70(12) | N(9)-Cu(1)-O(8)   | 92.42(5)  | O(2) <sup>i</sup> -Cu(1)-N(1) | 93.7(2)  | N(1A)-Cu(1)-N(3)                            | 114.85(2) | O(14)-Cu(1)-O(14) <sup>i</sup> | 180.0      |
| N(1)-Cu(1)-N(2) | 94.90(11)  | O(17)-Cu(1)-O(8)  | 173.31(5) | N(2)-Cu(1)-N(1)               | 95.8(3)  | N(1A)-Cu(1)-N(3) <sup>i</sup>               | 155.46(2) | O(14)-Cu(1)-N(1)               | 74.821(1)  |
| O(3)-Cu(1)-O(1) | 101.65(11) | N(1)-Cu(1)-O(16)  | 93.86(5)  | O(2)-Cu(1)-O(1)               | 102.0(2) | N(1)-Cu(1)-N(3) <sup>i</sup>                | 91.94(1)  | O(14)-Cu(1)-N(13)              | 72.458(1)  |
| N(3)-Cu(1)-O(1) | 97.47(14)  | N(9)-Cu(1)-O(16)  | 78.14(5)  | O(2) <sup>i</sup> -Cu(1)-O(1) | 93.6(2)  | N(1)-Cu(1)-N(3)                             | 77.81(1)  | O(14)-Cu(1)-N(13) <sup>i</sup> | 107.542(1) |
| N(1)-Cu(1)-O(1) | 75.09(11)  | O(17)-Cu(1)-O(16) | 86.12(5)  | N(2)-Cu(1)-O(1)               | 96.7(3)  | N(3)-Cu(1)-N(3) <sup>i</sup>                | 89.43(1)  | O(14)-Cu(1)-N(1) <sup>i</sup>  | 105.179(1) |
| N(2)-Cu(1)-O(1) | 93.43(13)  | O(8)-Cu(1)-O(16)  | 98.47(5)  | N(1)-Cu(1)-O(1)               | 87.6(2)  |                                             |           |                                |            |
| O(3)-Cu(1)-O(2) | 91.49(10)  | N(1)-Cu(1)-O(18)  | 91.25(5)  |                               |          |                                             |           |                                |            |
| N(3)-Cu(1)-O(2) | 96.10(11)  | N(9)-Cu(1)-O(18)  | 97.89(5)  |                               |          |                                             |           |                                |            |
| N(1)-Cu(1)-O(2) | 92.38(10)  | O(17)-Cu(1)-O(18) | 84.80(5)  |                               |          |                                             |           |                                |            |
| N(2)-Cu(1)-O(2) | 74.91(10)  | O(8)-Cu(1)-O(18)  | 90.96(5)  |                               |          |                                             |           |                                |            |
| O(1)-Cu(1)-O(2) | 162.28(11) | O(16)-Cu(1)-O(18) | 169.87(5) |                               |          |                                             |           |                                |            |

Symmetry transformations used to generate equivalent atoms for: (3) -x+1, y, -z+1/2; (4) (i) -x+1/2, -y+1/2, z; (5) (i) -x+1, -y, -z+1;

**Table S3.** Hydrogen bonds and selected interactions for compounds **1** - **5** (Å and °).

| Compound | D-H...A                                       | (D-H) (Å) | (H...A) (Å) | (D...A) (Å) | <(DH...A) (°) |
|----------|-----------------------------------------------|-----------|-------------|-------------|---------------|
| <b>1</b> | O(1)-H(1) ...Cl(1) <sup>i</sup>               | 0.87      | 2.63        | 3.479(3)    | 165.9         |
|          | O2(1)-H(1) ...O(5) <sup>ii</sup>              | 0.87      | 1.90        | 2.731(4)    | 159.1         |
| <b>2</b> | C(2)-H(2) ...O(17)                            | 0.95      | 2.48        | 3.03(2)     | 117.2         |
|          | C(3)-H(3) ...F(4) <sup>i</sup>                | 0.95      | 2.50        | 3.31(2)     | 142.4         |
|          | C(5)-H(5) ...F(2) <sup>ii</sup>               | 0.95      | 2.43        | 3.29(2)     | 150.7         |
|          | C(7)-H(7A) ...F(5)                            | 0.99      | 2.63        | 3.32(2)     | 126.6         |
|          | C(10)-H(10) ...F(4) <sup>iii</sup>            | 0.95      | 2.53        | 3.16(2)     | 123.8         |
|          | C(13)-H(13) ...O(18) <sup>iv</sup>            | 0.95      | 2.61        | 3.36(2)     | 135.2         |
|          | C(15)-H(15A) ...F(2)                          | 0.99      | 2.49        | 3.38(2)     | 149.3         |
|          | O(8)-H(8) ...F(5) <sup>iii</sup>              | 0.84(3)   | 1.74(3)     | 2.58(1)     | 176(3)        |
|          | O(16)-H(16) ...F(1)                           | 0.74(3)   | 1.97(3)     | 2.71(1)     | 177(3)        |
|          | O(17)-H(17A) ...F(1) <sup>v</sup>             | 0.78(2)   | 1.98(2)     | 2.77(1)     | 177(2)        |
|          | O(17)-H(17A) ...F(6) <sup>v</sup>             | 0.78(2)   | 2.43(2)     | 2.88(1)     | 118(2)        |
|          | O(17)-H(17B) ...F(6) <sup>vi</sup>            | 0.85(2)   | 1.78(3)     | 2.63(1)     | 178(2)        |
|          | O(18)-H(18A) ...F(3) <sup>iii</sup>           | 0.74(2)   | 1.95(2)     | 2.69(2)     | 178(2)        |
|          | O(18)-H(18B) ...F(4) <sup>vi</sup>            | 0.80(3)   | 1.96(3)     | 2.76(2)     | 172(2)        |
| <b>3</b> | C(8)-H(8) ...O(5A)                            | 0.95      | 2.7173(127) | 3.4609(151) | 135.7         |
|          | C(9)-H(9) ...O(5)                             | 0.95      | 2.4763(117) | 3.3027(142) | 145.1         |
|          | C(13)-H(13B) ...O(1)                          | 0.99      | 2.63(7)     | 3.4268(111) | 134.1         |
|          | C(13)-H(13B) ...O(3) <sup>i</sup>             | 0.98      | 2.719(72)   | 3.6593(113) | 158.4         |
|          | C(11)-H(11) ...O(3) <sup>i</sup>              | 0.95      | 2.6185(75)  | 3.5055(114) | 155.7         |
|          | C(1)-H(1) ...O(3) <sup>ii</sup>               | 0.95      | 2.5635(74)  | 3.2237(107) | 127.0         |
|          | C(10)-H(10) ...O(6A) <sup>iii</sup>           | 0.95      | 2.3348(138) | 3.0015(163) | 126.8         |
|          | C(6)-H(6A) ...O(5A) <sup>iv</sup>             | 0.99      | 2.5293(126) | 3.2491(151) | 129.3         |
|          | C(7)-H(7A) ...O(5) <sup>iv</sup>              | 0.99      | 2.7414(113) | 3.3224(141) | 117.9         |
|          | C(7)-H(7A) ...O(6A) <sup>v</sup>              | 0.99      | 2.6313(133) | 3.5059(159) | 147.4         |
| <b>4</b> | C(8)-H(8) ...O(6) <sup>vi</sup>               | 0.95      | 2.2416(120) | 3.0351(149) | 142.3         |
|          | C(2)-H(2)-N(3A) <sup>i</sup>                  | 0.93      | 2.64        | 3.38(2)     | 136.9         |
|          | C(2B) <sup>i</sup> -H(2B)-N(3)                | 0.93      | 2.69        | 3.491(7)    | 145.3         |
|          | N(2)-H(2N)-O(2) <sup>iii</sup>                | 0.98(4)   | 1.81(4)     | 2.731(4)    | 156(4)        |
|          | O(2)-H(2BO)-F(2A)                             | 0.97(2)   | 2.06(5)     | 2.766(1)    | 129(5)        |
|          | O(2)-H(2BO)-F(2B)                             | 0.97(2)   | 1.97(2)     | 2.930(1)    | 172(6)        |
|          | O(2)-H(2BO)-F(4B)                             | 0.97(2)   | 2.51(6)     | 3.08(3)     | 118(4)        |
|          | O(2)-H(2AO)-F(1A) <sup>iii</sup>              | 0.96(2)   | 2.01(3)     | 2.961(1)    | 171(6)        |
|          | O(2)-H(2AO)-F(4A) <sup>iii</sup>              | 0.96(2)   | 2.34(4)     | 3.103(1)    | 136(4)        |
|          | O(2)-H(2AO)-F(1B) <sup>iii</sup>              | 0.96(2)   | 1.76(4)     | 2.64(2)     | 150(6)        |
| <b>5</b> | N(2A) <sup>i</sup> -H(2AN) <sup>i</sup> -O(1) | 1.02(2)   | 1.91(3)     | 2.746(7)    | 137.3(1)      |
|          | O(15)-H(15)-O(22) <sup>i</sup>                | 0.79(4)   | 2.15(4)     | 2.787(3)    | 137(4)        |
|          | C(12)-H(12)-O(23)                             | 0.95      | 2.55        | 3.300(4)    | 136.1         |
|          | C(2) <sup>ii</sup> -H(2) <sup>ii</sup> -O(23) | 0.95      | 2.32        | 3.209(4)    | 154.6         |
|          | O(14)-H(14)-Cl(2)                             | 0.77(4)   | 2.83(4)     | 3.5938(19)  | 172(3)        |
|          | O(14)-H(14)-O(21)                             | 0.77(4)   | 2.12(4)     | 2.833(3)    | 154(3)        |
|          | O(14)-H(14)-O(24)                             | 0.77(4)   | 2.46(4)     | 3.129(3)    | 147(3)        |

Symmetry transformations used to generate equivalent atoms for: **(1)** (i)  $-x+1/2, -y+1/2, -z+1$ , (ii)  $x-1/2, y-1/2, z$ ; **(2)** (i)  $-x+1, y+1/2, -z+1/2$ , (ii)  $x, -y-1/2, z-1/2$ , (iii)  $-x+2, -y, -z+2$ , (iv)  $x, -y+1/2, z+1/2$ , (v)  $-x+1, -y, -z+2$ , (vi)  $x, y+1, z$ ; **(3)** (i)  $x+1/2, y+1/2, -z+1/2$ , (ii)  $-x+1, y, -z+1/2$ , (iii)  $-x+1/2, y-1/2, z$ , (iv)  $-x+1, -y+1, -z+1$ , (v)  $x, y-1, z$ , (vi)  $-x+1, -y+2, -z+1$ ; **(4)** (i)  $-x+1/2, -y+1/2, z$ , (ii)  $-x+1/2, y, z-1/2$ ; (iii)  $x-1/2, -y, -z-1/2$ ; **(5)** (i)  $-x, -y, -z$ ;

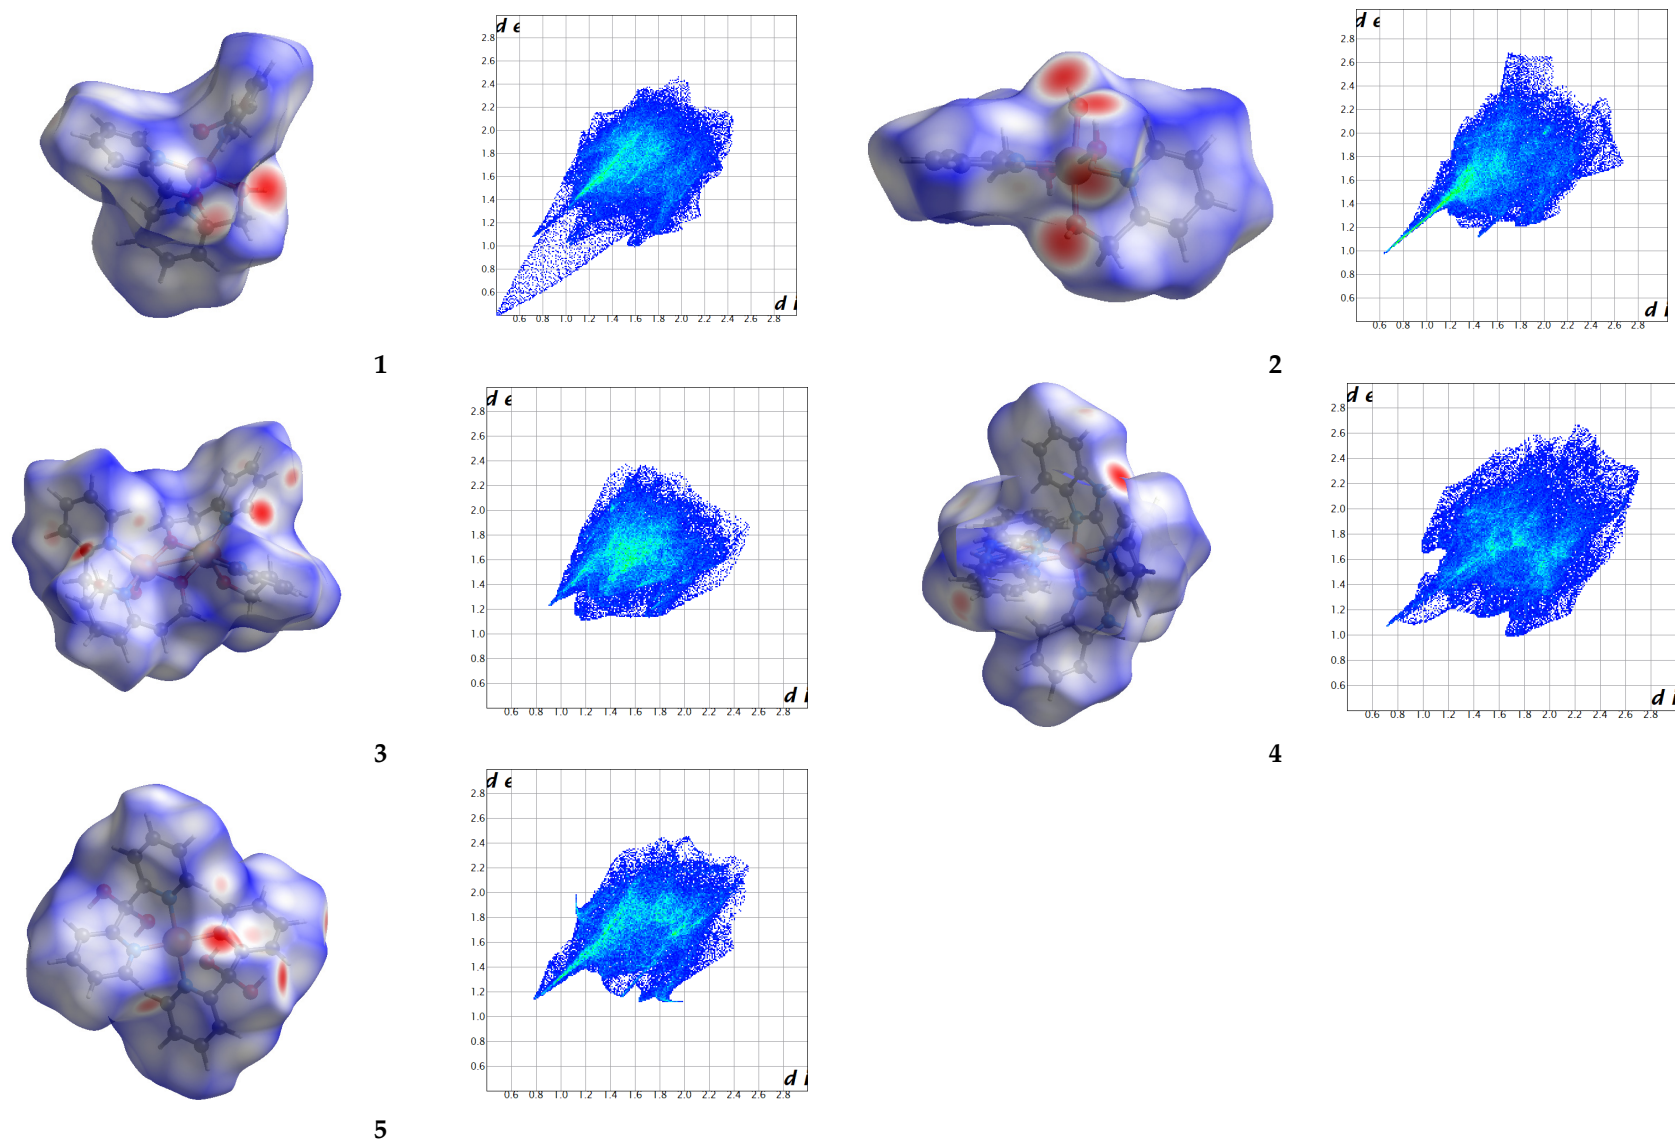

**Figure S1.** Hirshfeld surface analysis of the copper(II) complexes showing the  $d_{\text{norm}}$  and fingerprint plots.

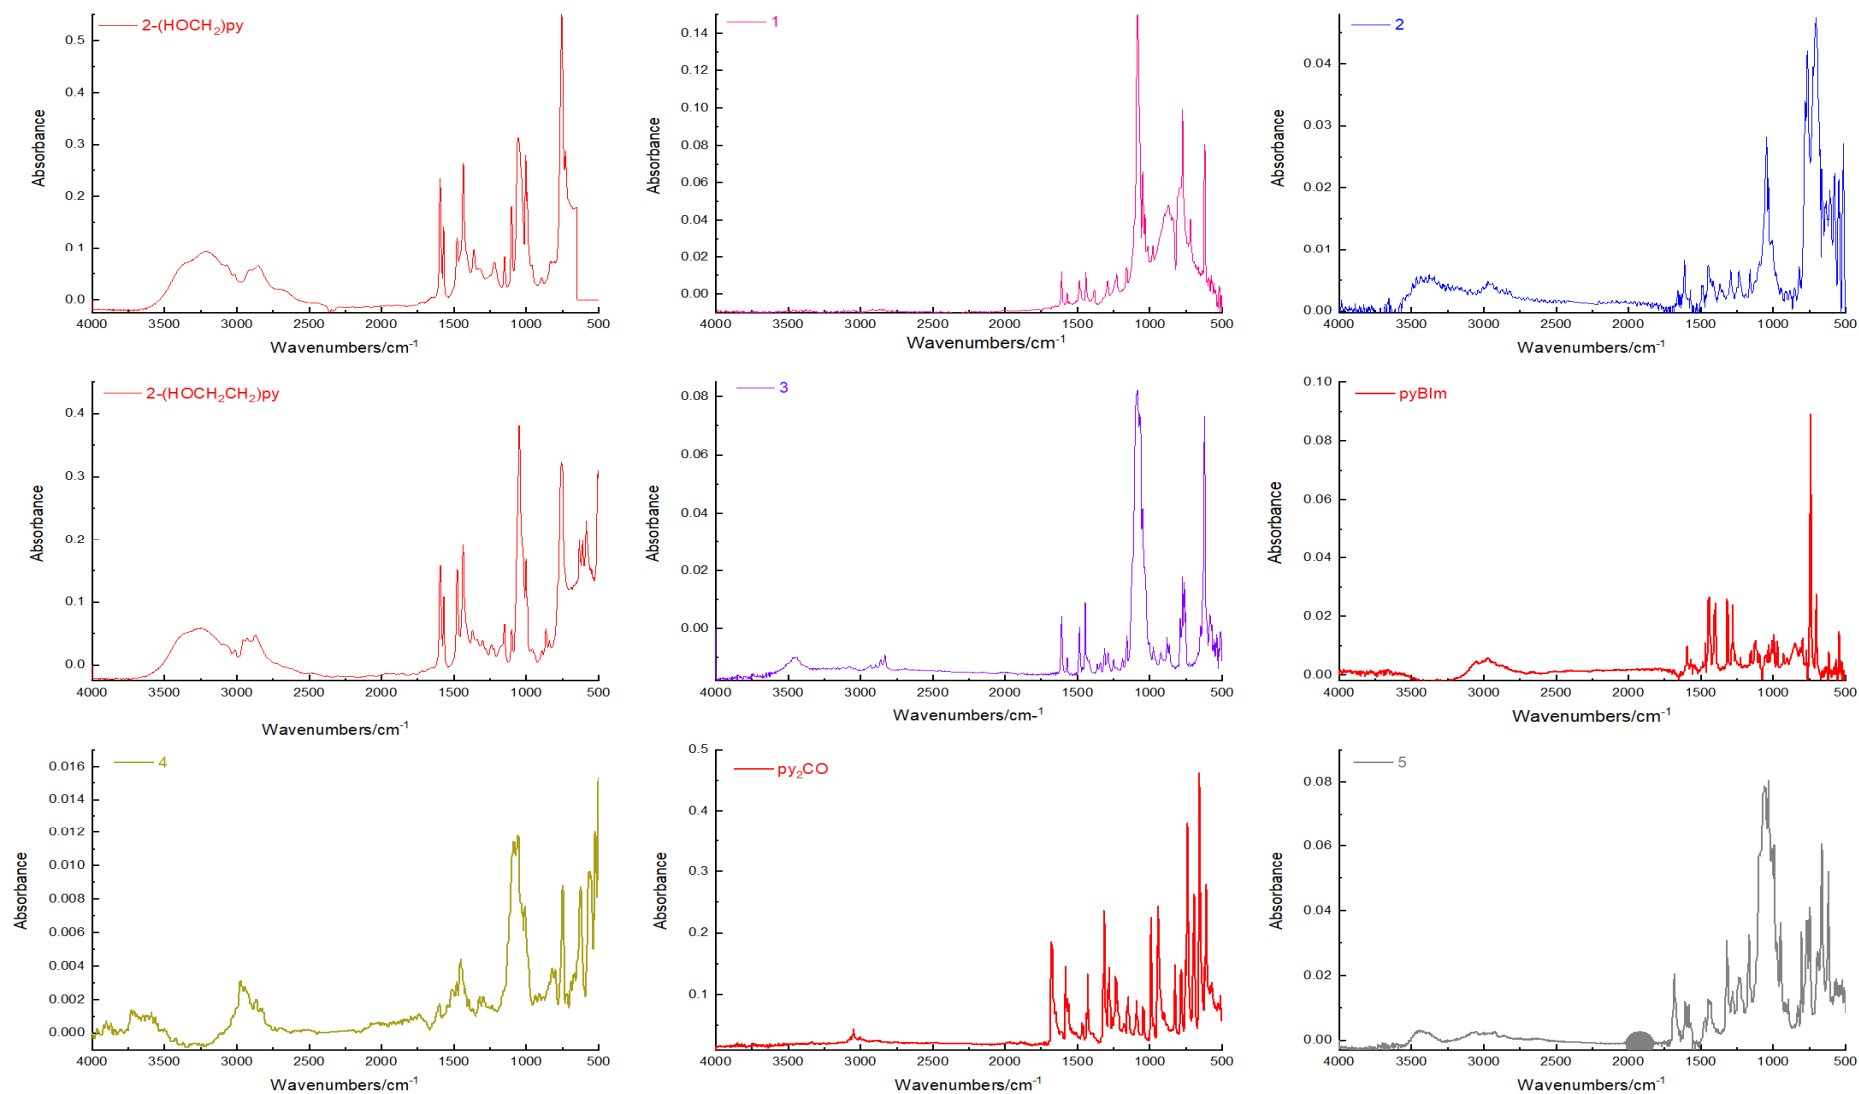

**Figure S2.** FTIR spectra of free ligands (red line) and copper(II) complexes.

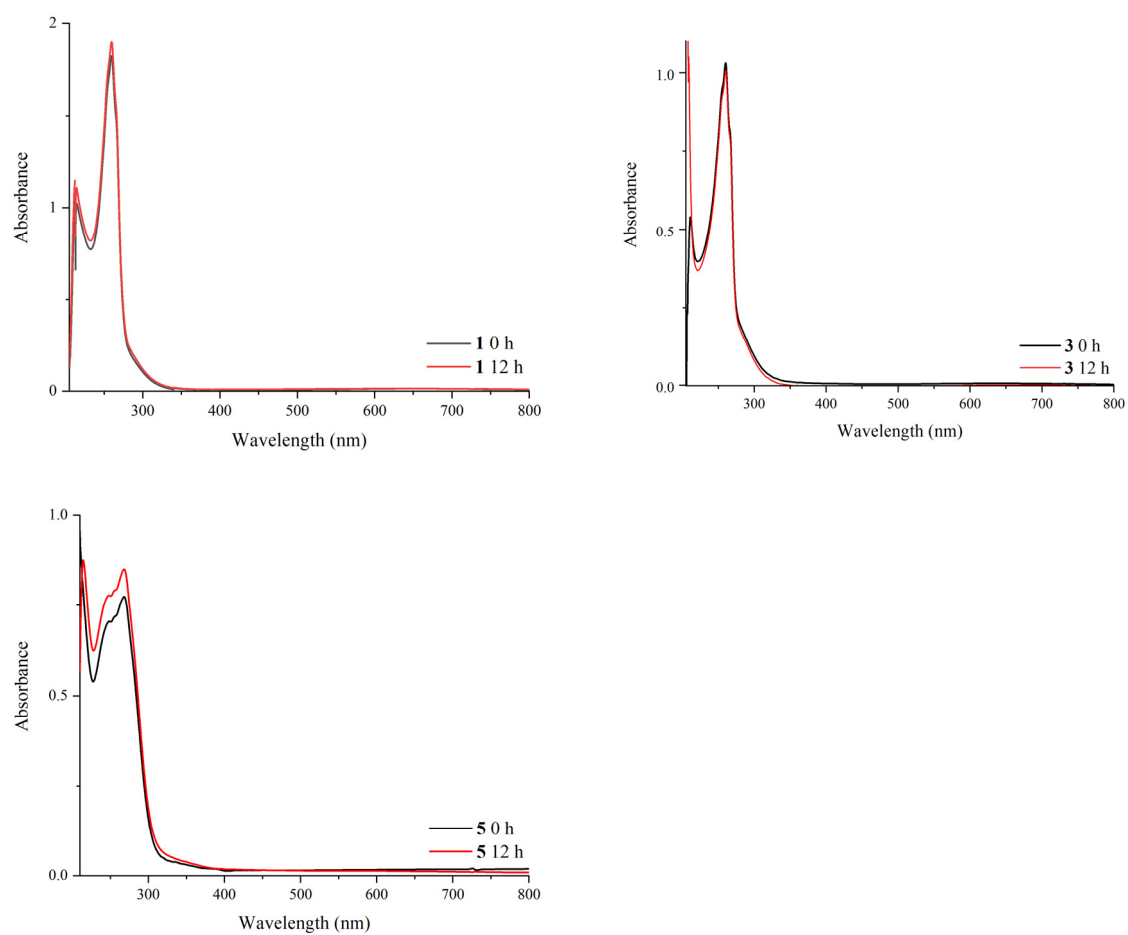

**Figure S3.** Selected copper complexes (**1**, **3** and **5**) stability in PBS after 0 or 12 h of incubation determined by UV-Vis spectrometry.
